# Supplementary material
Source: PubMed Central journal article supplement (PMC5487609)
Supplement: AAC.00562-17_zac007176321s1.pdf [file AAC.00562-17_zac007176321s1.pdf]

Supplementary Materials

**Genetic and functional characterization of *bla*<sub>CTX-M-199</sub>, a novel tazobactam and sulbactam resistance-encoding gene located in a conjugative *mcr-1*-bearing IncI2 plasmid**

Jiachang Cai<sup>1#</sup>, Qipeng Cheng<sup>2,3#</sup>, Yingbo Shen<sup>4</sup>, Danxia Gu<sup>5</sup>, Ying Fang<sup>1</sup>, Edward Wai-Chi Chan<sup>3</sup>, Sheng Chen<sup>2,3\*</sup>

Running title: Novel CTX-M-191 Enzyme

<sup>1</sup> Clinical Microbiology Laboratory, The Second Affiliated Hospital of Zhejiang University, Hangzhou, China;

<sup>2</sup> Shenzhen Key lab for Food Biological Safety Control, Food Safety and Technology Research Center, Hong Kong PolyU Shen Zhen Research Institute, Shenzhen, P. R. China;

<sup>3</sup> State Key Lab of Chirosciences, Department of Applied Biology and Chemical Technology, The Hong Kong Polytechnic University, Hung Hom, Kowloon, Hong Kong;

<sup>4</sup> Beijing Advanced Innovation Center for Food Nutrition and Human Health, College of Veterinary Medicine, China Agricultural University, Beijing, China

<sup>5</sup> Center for Cancer Biology and Innovative Therapeutics, Key Laboratory of Tumor Molecular Diagnosis and Individualized Medicine of Zhejiang Province, Clinical Research Institute, Zhejiang Provincial People's Hospital, Hangzhou, China

#Contribute equally to the work.

\*Corresponding authors: Sheng Chen, Tel: 852-34008795, Email: sheng.chen@polyu.edu.hk

**Keywords:** CTX-M-199, inhibitor resistance, *mcr-1*, conjugative IncI2 plasmid, function, enzyme kinetics

**Supplementary Table 1. Primers used in this study**

| <b>Gene</b>                      | <b>Primer Sequence</b>                                  | <b>Application</b>                                                                                            |
|----------------------------------|---------------------------------------------------------|---------------------------------------------------------------------------------------------------------------|
| C-CTX-M-64-F                     | CGGGATCCTTGCTCTGTGGATAACTTG<br>CAG                      | Amplification of <i>bla</i> <sub>CTX-M-64</sub><br>and <i>bla</i> <sub>CTX-M-199</sub> for further<br>cloning |
| C-CTX-M-64-R                     | CCCAAGCTTAGGAACCACGGAGCTTA<br>TGG                       |                                                                                                               |
| M-CTX-M-64-F                     | AGTCAGAGCTCCAAACGGCGGACGT<br>ACAG                       | Cloning and expression of<br>mature form of CTX-M-64 and<br>CTX-M-199                                         |
| M-CTX-M-64-R                     | CGCGGATCCTTACAAACCGTCGGTGA<br>CG                        |                                                                                                               |
| CTX-M-199 (T <sup>109</sup> A)-F | GTAACTACAATCCGATTGCCGAAAA<br>ACACGTCAAC                 | T <sup>109</sup> A mutation in CTX-M-199                                                                      |
| CTX-M-199 (T <sup>109</sup> A)-R | GTTGACGTGTTTTTCGGCAATCGGATT<br>GTAGTTAAC                | T <sup>130</sup> S mutation in CTX-M-199                                                                      |
| CTX-M-199 (T <sup>130</sup> S)-F | CCGCGTTGCAGTACAGCGACAATACC<br>GCCAT                     |                                                                                                               |
| CTX-M-199 (T <sup>130</sup> S)-R | ATGGCGGTATTGTCGCTGTACTGCAAC<br>GCGG                     | S <sup>130</sup> C mutation in CTX-M-64                                                                       |
| CTX-M-64 (S <sup>130</sup> C)-F  | CCGCGTTGCAGTACTGCGACAATAC<br>GTATTGTCGCAGTACTGCAACGCGG  |                                                                                                               |
| CTX-M-64 (S <sup>130</sup> C)-R  | CCGCGTTGCAGTACGACGACAATAC<br>GTATTGTCGTCGTA             | S <sup>130</sup> D mutation in CTX-M-64                                                                       |
| CTX-M-64 (S <sup>130</sup> D)-F  | CCGCGTTGCAGTACGACGACAATAC<br>GTATTGTCGTCGTA             |                                                                                                               |
| CTX-M-64 (S <sup>130</sup> D)-R  | CCGCGTTGCAGTACGCGACAATAC<br>GTATTGTCGCCGTA              | S <sup>130</sup> G mutation in CTX-M-64                                                                       |
| CTX-M-64 (S <sup>130</sup> G)-F  | CCGCGTTGCAGTACGCGACAATAC<br>GTATTGTCGCCGTA              |                                                                                                               |
| CTX-M-64 (S <sup>130</sup> G)-R  | CCGCGTTGCAGTACAATGACAATAC<br>GTATTGTCATTGTA             | S <sup>130</sup> N mutation in CTX-M-64                                                                       |
| CTX-M-64 (S <sup>130</sup> N)-F  | CCGCGTTGCAGTACAATGACAATAC<br>GTATTGTCATTGTA             |                                                                                                               |
| CTX-M-64 (S <sup>130</sup> N)-R  | CCGCGTTGCAGTACACCGACAATAC<br>GTATTGTCGGTGTACTGCAACGCGG  | S <sup>130</sup> T mutation in CTX-M-64                                                                       |
| CTX-M-64 (S <sup>130</sup> T)-F  | CCGCGTTGCAGTACACCGACAATAC<br>GTATTGTCGGTGTACTGCAACGCGG  |                                                                                                               |
| CTX-M-64 (S <sup>130</sup> T)-R  | CCGCGTTGCAGTACGTGGACAATAC<br>GTATTGTCCACGTA             | S <sup>130</sup> V mutation in CTX-M-64                                                                       |
| CTX-M-64 (S <sup>130</sup> V)-F  | CCGCGTTGCAGTACGTGGACAATAC<br>GTATTGTCCACGTA             |                                                                                                               |
| CTX-M-64 (S <sup>130</sup> V)-R  | TAACTACAATCCGATTACCGAAAAAC<br>TAATCGGATTGTAGTTAACCAGATC | A <sup>109</sup> T mutation in CTX-M-64                                                                       |
| CTX-M-64 (A <sup>109</sup> T)-F  | TAATCGGATTGTAGTTAACCAGATC                               |                                                                                                               |

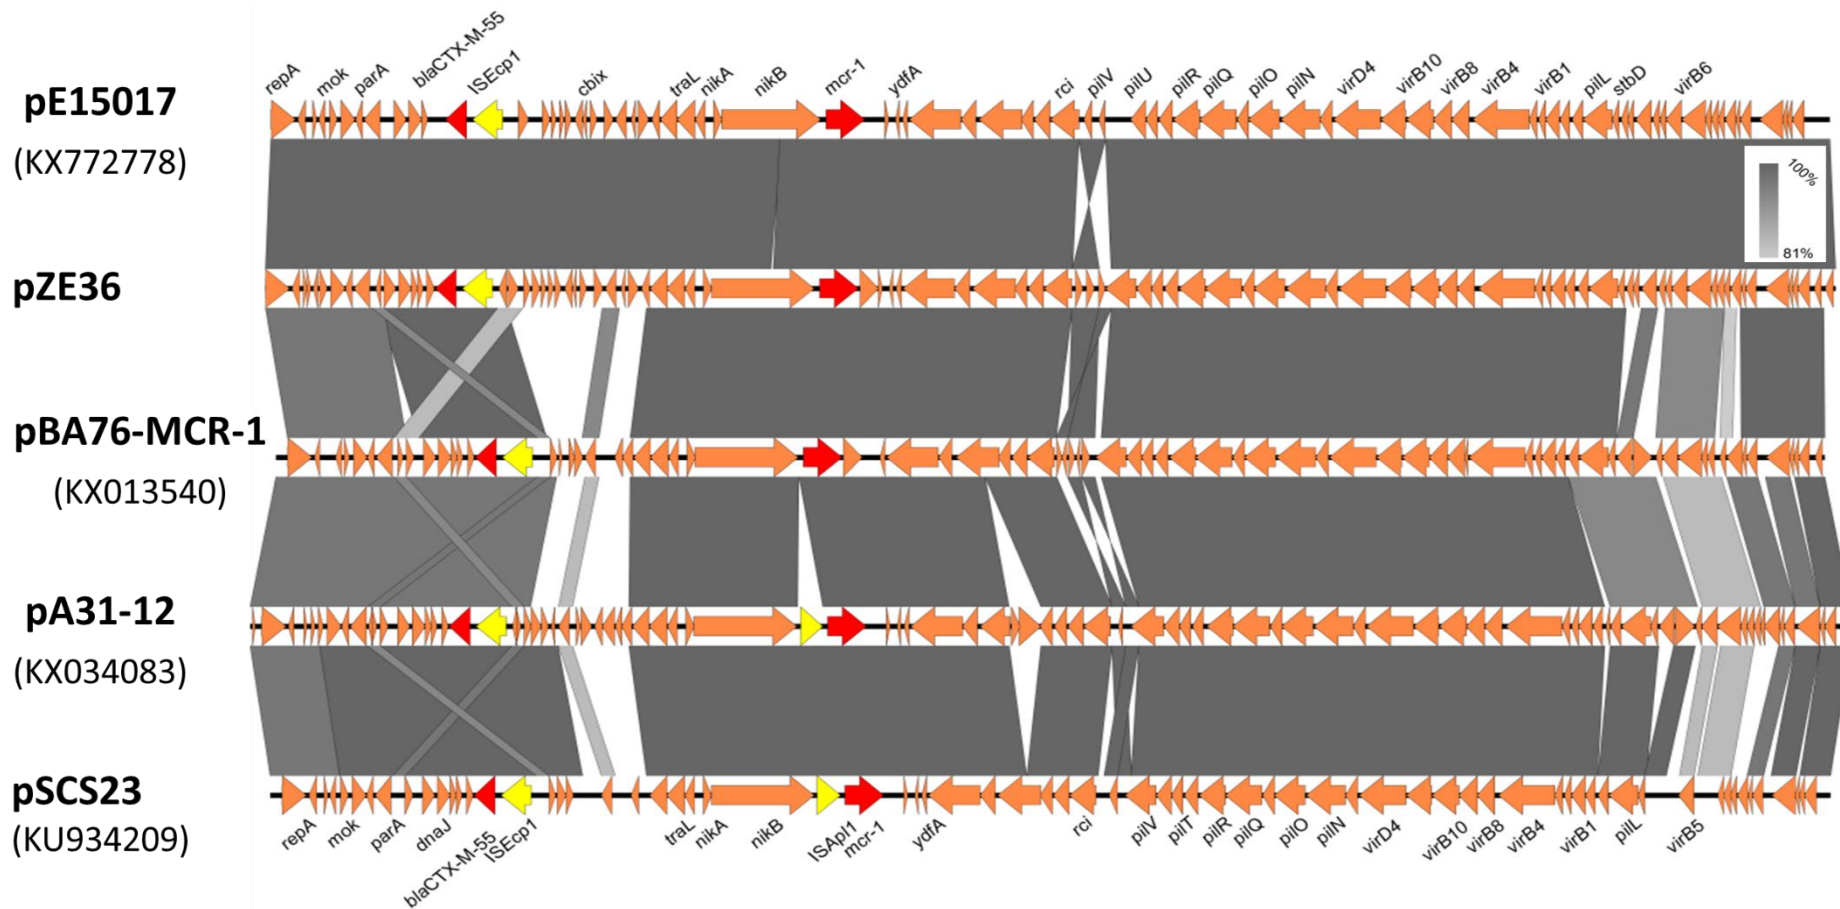

**Supplementary Figure 1. Alignment of pZE36 with plasmids of similar types in GenBank.** The figure was prepared using Easyfig(12). All insertion sequences were labelled as yellow and antimicrobial resistance genes were labelled as red.
